# Supplementary material for: Atomic layer deposition of Er-doped yttrium aluminum gallium garnet nanofilms with tunable crystallization and electroluminescence properties
Source: Royal Society of Chemistry journal article supplement (doi:10.1039/d3dt00827d), 2023-01-01
Supplement: d3dt00827d1.pdf [file d3dt00827d1.pdf]

## Supplementary Material

### Atomic layer deposition of Er-doped yttrium aluminum gallium garnet nanofilms with tunable crystallization and electroluminescence properties

Zhimin Yu, Yuan Kang, Yang Yang, Jiaming Sun

School of Materials Science and Engineering, Tianjin Key Lab for Rare Earth Materials and Applications, Nankai University, Tianjin 300350, China

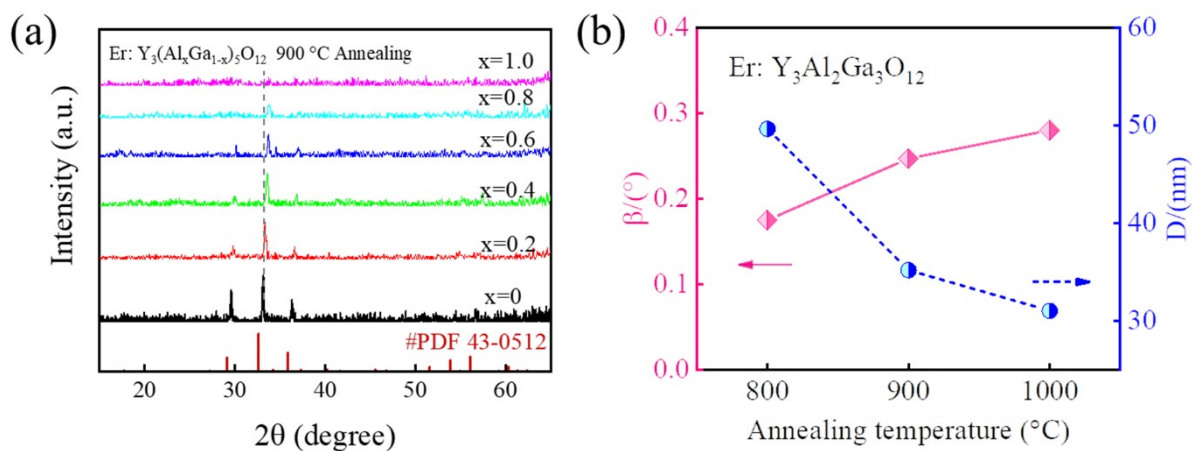

**Figure S1.** (a) XRD patterns of Er-doped  $Y_3(Al_xGa_{1-x})_5O_{12}$  nanofilms with different Al contents that annealed at 900 °C. (b) The distribution of  $\beta$  (FWHM) and  $D$  (calculated crystallite size) in the  $Y_3Al_2Ga_3O_{12}$  ( $x=0.4$ ) nanolaminates annealed at different temperatures.

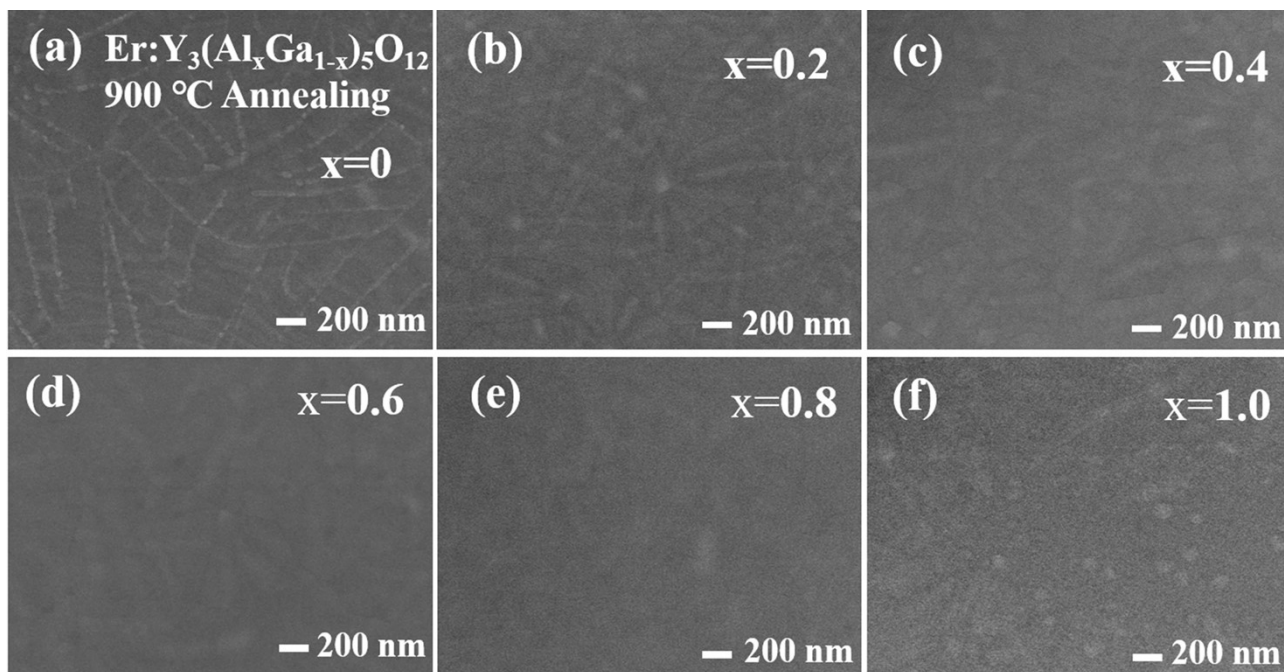

**Figure S2.** SEM images of the 900 °C annealed Er-YAGG nanofilms with different Al contents.

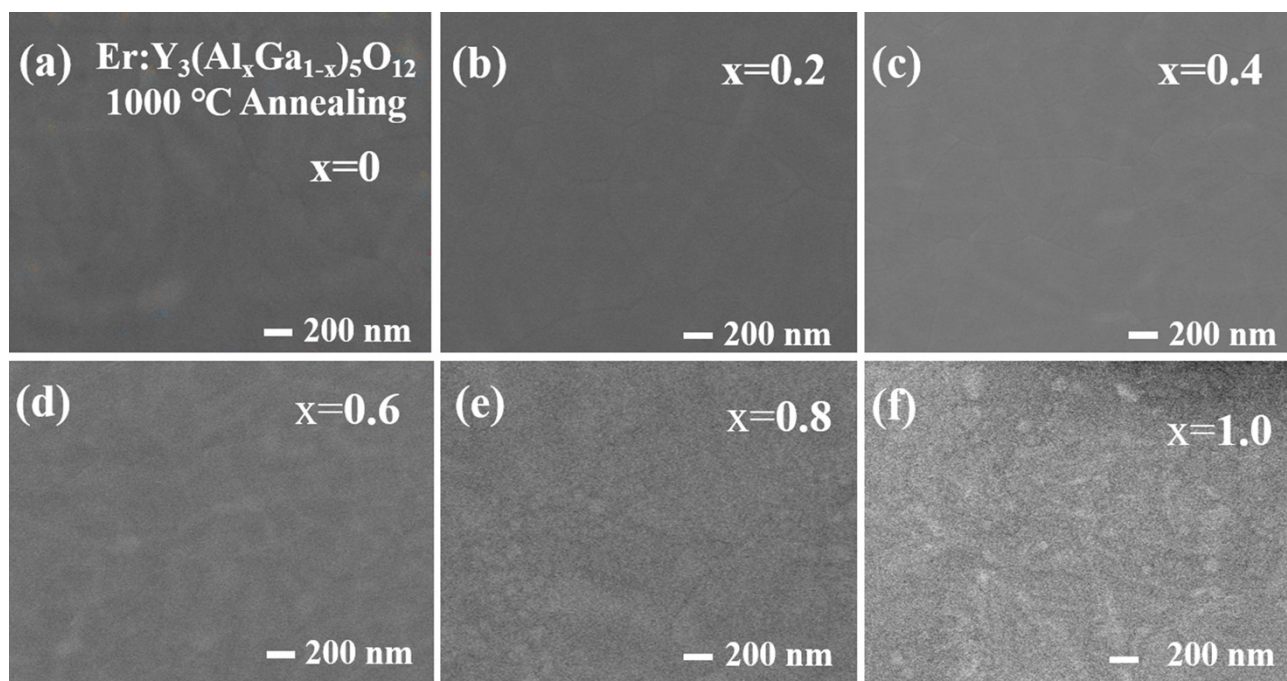

**Figure S3.** SEM images of the 1000 °C annealed Er-YAGG nanofilms with different Al contents.

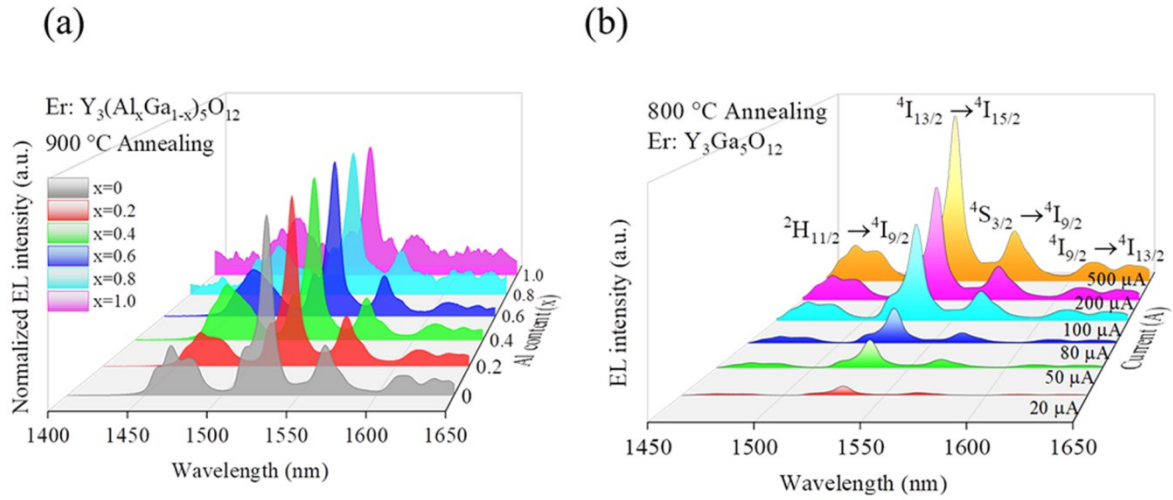

**Figure S4.** (a) The Normalized NIR EL spectra of Er-YAGG MOSLEDs with different Al contents annealed at 900 °C. (b) The NIR EL spectra from the MOSLEDs based on the 800 °C annealed  $Y_3Ga_5O_{12}:Er$  nanofilms under different injection currents.

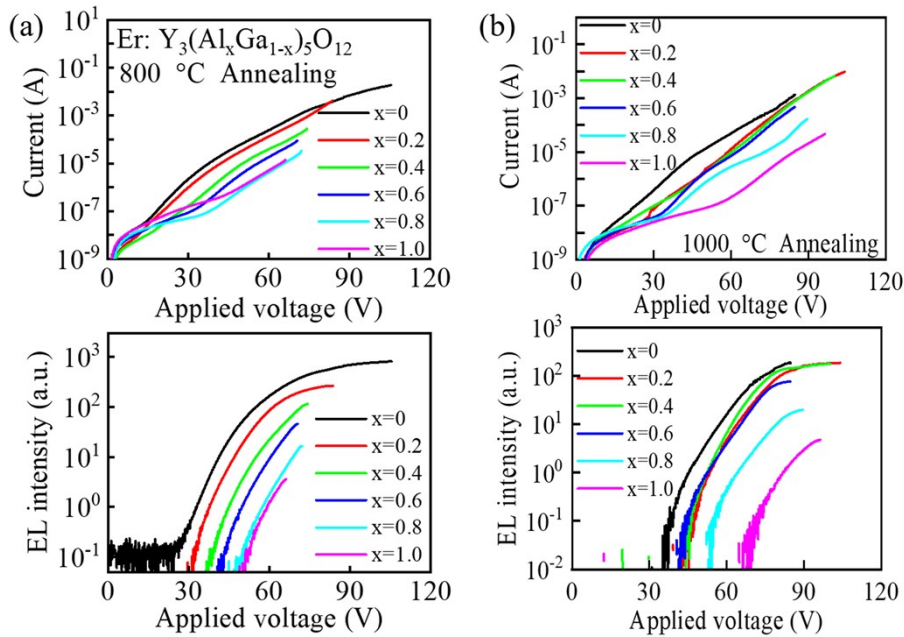

**Figure S5.** The dependence of the 1530 nm EL intensities and the injection currents on the applied voltages for the Er-YAGG MOSLEDs with different Al contents annealed at (a) 800 °C and (b) 1000 °C.

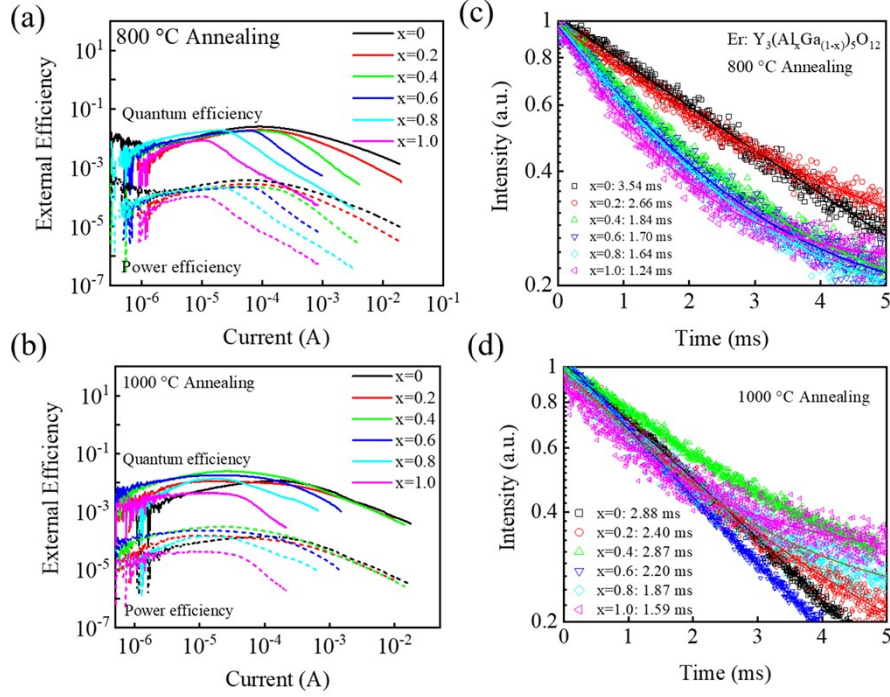

**Figure S6.** Power efficiencies and external quantum efficiencies versus the injection currents of Er-YAGG MOSLEDs with different Al contents annealed at (a) 800 °C and (b) 1000 °C. Their EL decay traces are compared in (c) and (d), respectively.

**Table S1.** The EL intensity (a.u.), power density, EQE and EL decay lifetime  $\tau$  from the Er-YAGG nanolaminate MOSLEDs with different annealing temperatures and Al contents.

| Er:<br>YAG<br>G | 800 °C Annealing |                                     |         |             | 900 °C Annealing |                                     |         |             | 1000 °C Annealing |                                     |         |             |
|-----------------|------------------|-------------------------------------|---------|-------------|------------------|-------------------------------------|---------|-------------|-------------------|-------------------------------------|---------|-------------|
|                 | EL               | Power Density (mW/cm <sup>2</sup> ) | EQE (%) | $\tau$ (ms) | EL               | Power Density (mW/cm <sup>2</sup> ) | EQE (%) | $\tau$ (ms) | EL                | Power Density (mW/cm <sup>2</sup> ) | EQE (%) | $\tau$ (ms) |
| x=0             | 814              | 10.03                               | 2.51    | 3.54        | 270              | 3.36                                | 1.9     | 3.36        | 260               | 3.12                                | 1.2     | 2.88        |
| x=0.2           | 265              | 3.23                                | 1.99    | 2.66        | 165              | 2.01                                | 1.67    | 2.56        | 190               | 2.27                                | 1.1     | 2.40        |
| x=0.4           | 118              | 1.42                                | 1.80    | 1.84        | 140              | 1.67                                | 3.29    | 3.10        | 160               | 2.17                                | 2.41    | 2.87        |
| x=0.6           | 43               | 0.50                                | 1.70    | 1.70        | 118              | 1.39                                | 2.8     | 2.43        | 75                | 0.93                                | 1.7     | 2.20        |
| x=0.8           | 16.5             | 0.16                                | 1.90    | 1.64        | 22               | 0.26                                | 0.64    | 1.85        | 27                | 0.27                                | 1.3     | 1.87        |
| x=1.0           | 3.4              | 0.03                                | 0.70    | 1.24        | 4.5              | 0.05                                | 0.8     | 1.58        | 4.7               | 0.06                                | 0.45    | 1.59        |
